# Supplementary material for: Knowledge, Self-Confidence and Attitudes towards Suicidal Patients at Emergency and Psychiatric Departments: A Randomised Controlled Trial of the Effects of an Educational Poster Campaign
Source: Int J Environ Res Public Health. 2017 Mar 14;14(3):304. doi: 10.3390/ijerph14030304 (PMC5369140; doi:10.3390/ijerph14030304)
Supplement: Supplementary file 1 [file ijerph-14-00304-s001.pdf]

## SHORT SURVEY ON KNOWLEDGE, SELF-CONFIDENCE AND ATTITUDES TOWARDS SUICIDAL BEHAVIOUR

Please answer all questions one by one in sequence. Always tick the checkbox that best applies to you. Thank you very much.

| Knowledge                                                                                               | very low                 | low                      | neutral                  | high                     | very high                |
|---------------------------------------------------------------------------------------------------------|--------------------------|--------------------------|--------------------------|--------------------------|--------------------------|
| 1.1. Facts about suicide                                                                                | <input type="checkbox"/> |
| 1.2. Suicide warning signs                                                                              | <input type="checkbox"/> |
| 1.3. How to ask someone who may be suicidal                                                             | <input type="checkbox"/> |
| 1.4. Persuading someone to get help                                                                     | <input type="checkbox"/> |
| 1.5. How to get help for someone who may be suicidal                                                    | <input type="checkbox"/> |
| 1.6. Information about local resources for help with suicide                                            | <input type="checkbox"/> |
| 1.7. Please rate your general understanding about suicide and suicide prevention                        | <input type="checkbox"/> |
|                                                                                                         |                          |                          |                          | agree                    | disagree                 |
| 2.1. Suicide is always the act of a mentally ill or psychotic person.                                   |                          |                          |                          | <input type="checkbox"/> | <input type="checkbox"/> |
| 2.2. There is no relationship between drugs/alcohol and suicide.                                        |                          |                          |                          | <input type="checkbox"/> | <input type="checkbox"/> |
| 2.3. There are one or two causes or motives that explain most suicides.                                 |                          |                          |                          | <input type="checkbox"/> | <input type="checkbox"/> |
| 2.4. Removing the means of suicide (e.g., removal of handguns and poisons) would prevent many suicides. |                          |                          |                          | <input type="checkbox"/> | <input type="checkbox"/> |
| 2.5. Suicidal tendencies are inherited, and suicide runs in families.                                   |                          |                          |                          | <input type="checkbox"/> | <input type="checkbox"/> |

|                                                                                                                        |                            |                          |                          |                          |                          |
|------------------------------------------------------------------------------------------------------------------------|----------------------------|--------------------------|--------------------------|--------------------------|--------------------------|
| 2.6. Everyone who commits suicide is depressed.                                                                        |                            |                          |                          | <input type="checkbox"/> | <input type="checkbox"/> |
| 2.7. People who make plans to commit suicide keep their thoughts to themselves and the suicide occurs without warning. |                            |                          |                          | <input type="checkbox"/> | <input type="checkbox"/> |
| 2.8. People who talk about suicide do not kill themselves.                                                             |                            |                          |                          | <input type="checkbox"/> | <input type="checkbox"/> |
| <b>Self-confidence</b>                                                                                                 | <b>strongly disagree</b>   | <b>disagree</b>          | <b>undecided</b>         | <b>agree</b>             | <b>strongly agree</b>    |
| 3.1. I am confident in my ability to successfully assess suicidal patients.                                            | <input type="checkbox"/>   | <input type="checkbox"/> | <input type="checkbox"/> | <input type="checkbox"/> | <input type="checkbox"/> |
| 3.2. I am confident in my ability to successfully treat suicidal patients.                                             | <input type="checkbox"/>   | <input type="checkbox"/> | <input type="checkbox"/> | <input type="checkbox"/> | <input type="checkbox"/> |
| 3.3. I am hesitant to ask a patient if he or she is suicidal.                                                          | <input type="checkbox"/>   | <input type="checkbox"/> | <input type="checkbox"/> | <input type="checkbox"/> | <input type="checkbox"/> |
| <b>Attitudes</b>                                                                                                       | <b>completely disagree</b> | <b>disagree</b>          | <b>undecided</b>         | <b>agree</b>             | <b>completely agree</b>  |
| 4.1. It is a human duty to try to stop someone from dying by suicide.                                                  | <input type="checkbox"/>   | <input type="checkbox"/> | <input type="checkbox"/> | <input type="checkbox"/> | <input type="checkbox"/> |
| 4.2. If someone wants to commit suicide, it is their business and we should not interfere.                             | <input type="checkbox"/>   | <input type="checkbox"/> | <input type="checkbox"/> | <input type="checkbox"/> | <input type="checkbox"/> |
| 4.3. I am prepared to help a person in a suicidal crisis by making contact.                                            | <input type="checkbox"/>   | <input type="checkbox"/> | <input type="checkbox"/> | <input type="checkbox"/> | <input type="checkbox"/> |

Thank you for your cooperation!
